# Supplementary material for: Enhanced thermoelectric and mechanical properties of Cu1.8S1−xPx bulks mediated by mixed phase engineering
Source: Royal Society of Chemistry journal article supplement (doi:10.1039/d5tc00170f), 2025-01-01
Supplement: d5tc00170f1.pdf [file d5tc00170f1.pdf]

## Enhanced Thermoelectric and Mechanical Properties of $\text{Cu}_{1.8}\text{S}_{1-x}\text{P}_x$ Bulks Mediated by Mixed Phase Engineering

Xi Yan <sup>‡ a,b</sup>, Qin-Yuan Huang <sup>‡ a,b</sup>, Tian-Yu Yang <sup>a,b</sup>, Ding-Yi Yu <sup>c</sup>, Hao Yin <sup>a,b</sup>, Chong-Yu Wang <sup>a,b</sup>, Zhen-Hua Ge <sup>a,b\*</sup>, Yi-Xin Zhang <sup>a,b\*</sup>, and Hong-Jiang Pan <sup>a,b\*</sup>

<sup>a</sup> Faculty of Materials Science and Engineering, Kunming University of Science and Technology, Kunming 650093, China

<sup>b</sup> National-Local Joint Engineering Research Center for Technology of Advanced Metallic Solidification Forming and Equipment, Kunming 650093, China

<sup>c</sup> Inner Mongolia Research Institute, China University of Mining and Technology (Beijing), Ordos 017001, China

\*Corresponding authors.

<sup>‡</sup> Xi Yan and Qin-Yuan Huang contributed equally to this work.

E-mail: Z.-H. Ge ([zge@kust.edu.cn](mailto:zge@kust.edu.cn)); Yi-Xin Zhang ([yxzhang@kust.edu.cn](mailto:yxzhang@kust.edu.cn)); Hong-Jiang Pan ([hj\\_pan@kust.edu.cn](mailto:hj_pan@kust.edu.cn))

### Part 1. Supplementary Data and Diagrams

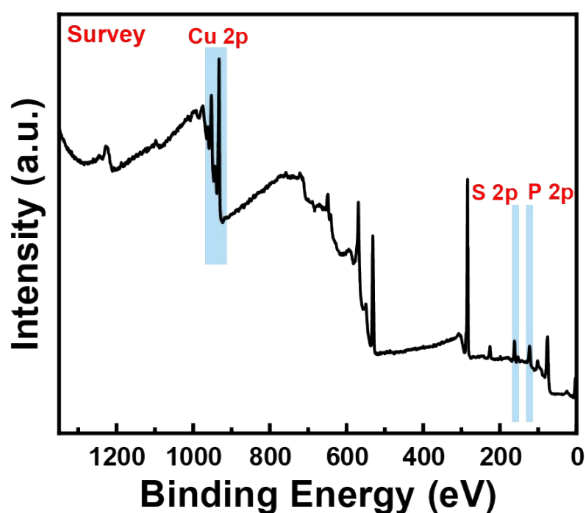

Fig. S1 XPS survey scan of the  $\text{Cu}_{1.8}\text{S}_{0.97}\text{P}_{0.03}$ .

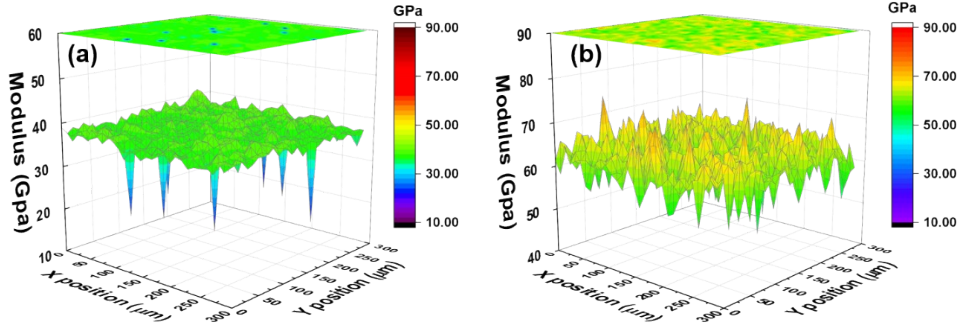

**Fig. S2.** Mechanics properties of  $\text{Cu}_{1.8}\text{S}_{1-x}\text{P}_x$  bulk samples. 3D cloud image of modulus for a) pure  $\text{Cu}_{1.8}\text{S}$ , b)  $\text{Cu}_{1.8}\text{S}_{0.97}\text{P}_{0.03}$ .

## Part 2. Single Parabolic Band (SPB) modeling

The  $\text{Cu}_{1.8}\text{S}$ , as a kind of degenerate semiconductor, can be analyzed by the Single Parabolic Band (SPB) Model with relaxation time approximation. The Seebeck coefficient can be expressed as:

$$S = \frac{k_B}{e} \left[ \frac{\left(\frac{5}{2} + \lambda\right) F_{\lambda + \frac{3}{2}}}{\left(\frac{3}{2} + \lambda\right) F_{\lambda + \frac{1}{2}}} - \eta \right] \quad (1)$$

The charge carrier concentration can be expressed as:

$$n_H = 4\pi \left( \frac{2m^* k_B T}{h^2} \right)^{3/2} F_{1/2} \quad (2)$$

The effective mass ( $m^*$ ) can be expressed as:

$$m^* = \frac{h^2}{2k_B T} \left[ \frac{n}{4\pi F_{1/2}(\eta)} \right]^{2/3} \quad (3)$$

The Fermi integral can be expressed as:

$$F_i(\eta) = \int_0^{\infty} \frac{x^i dx}{1 + \exp(x - \eta)} \quad (4)$$

where  $\eta$  is the simple Fermi energy,  $F_i(\eta)$  is the  $i$ -th Fermi integral,  $k_B$  is the Boltzmann constant,  $h$  is the Planck constant, and  $r$  is the scattering factor usually to be—0.5 meaning the main scattering mechanism is acoustic phonon scattering.
